# Supplementary material for: Revision of the WMO/GAW CO 2 Calibration Scale
Source: Copernicus journal article supplement (doi:10.5194/amt-2020-408), 2020-11-11
Supplement: Supplementary file 1 [file amt-2020-408-supplement.zip]

Archive with 2 entries (2 files):
- CO2_primary_all_valid_data_X2019_supplement.csv
- Hall_CO2_scale_revision_SM.pdf
