# Supplementary material for: Revision of the WMO/GAW CO 2 Calibration Scale
Source: Copernicus journal article supplement (doi:10.5194/amt-2020-408), 2020-11-11
Supplement: Supplementary file 1 [file amt-2020-408-supplement.zip › CO2_primary_all_valid_data_X2019_supplement.csv]

# CO2_DB is the CO2 mole fraction in the historical database (prior to 2017) (without corrections for X_loss and X_virial)
# Here we used peakcycle as the time variable for calculating CO2 loss: X_loss = -1*slope*(peakcycle+2) before 2009, or X_loss = -1*slope*(peakcycle+4) from 2009
# CO2_X2019 = CO2_DB + X_virial + X_loss
# For measurements made after 2016, the virial correction is no longer needed, and the loss correction was applied at the time of measurement
Cylinder#	Year	Month	Day	CO2_DB	slope_(ppm/cycle)	peakcycle	X_virial	X_loss	CO2_X2019	CO2_X2019_unc	CO2_correction_unc	xdate	Flag	xdate_mean	Episode_mean	Episode_std	Episode_N	AVG_corr_unc	Episode_unc
101	1996	11	14	395.99	-0.0121	14	0.027	0.194	396.211	0.097	0.038	1996.87	0	1996.94	396.373	0.106	5	0.035	0.076
101	1996	12	13	396.28	-0.00501	20	0.027	0.110	396.417	0.092	0.021	1996.95	0
101	1996	12	14	396.27	-0.0049	19	0.027	0.103	396.4	0.091	0.02	1996.96	0
101	1996	12	15	396.25	-0.01211	16	0.027	0.218	396.495	0.098	0.04	1996.96	0
101	1996	12	15	396.2	-0.00594	17	0.027	0.113	396.34	0.092	0.022	1996.96	0
101	1998	8	26	396.67	-0.0087	17	0.027	0.165	396.862	0.094	0.031	1998.65	0	1998.68	396.694	0.128	5	0.047	0.088
101	1998	8	26	396.38	-0.0135	14	0.027	0.216	396.623	0.099	0.042	1998.65	0
101	1998	8	27	396.48	-0.01196	14	0.027	0.191	396.698	0.097	0.038	1998.66	0
101	1998	9	24	396.53	-0.012	15	0.027	0.204	396.761	0.097	0.039	1998.73	0
101	1998	9	24	396.31	-0.01189	14	0.027	0.126	396.527	0.103	0.051	1998.73	0
101	2000	1	12	396.37	-0.00385	29	0.033	0.119	396.523	0.091	0.02	2000.03	0	2000.04	396.521	0.044	3	0.021	0.057
101	2000	1	13	396.46	-0.00335	19	0.033	0.070	396.563	0.091	0.015	2000.04	0
101	2000	1	13	396.36	-0.00396	19	0.033	0.083	396.476	0.091	0.017	2000.04	0
101	2001	5	23	396.36	-0.00456	35	0.033	0.169	396.562	0.093	0.025	2001.4	0	2001.47	396.513	0.075	2	0.034	0.079
101	2001	5	24	396.463	-0.0040479	35	0.033	0.150	396.463	0.092	0.022	2001.4	0
101	2002	12	6	396.31	-0.0048	14	0.033	0.077	396.42	0.091	0.018	2002.93	0	2002.99	396.348	0.071	4	0.021	0.063
101	2003	1	2	396.17	-0.00733	13	0.033	0.110	396.313	0.093	0.025	2003.01	0
101	2003	1	4	396.17	-0.0042	13	0.033	0.063	396.266	0.091	0.016	2003.01	0
101	2003	1	7	396.27	-0.0047	17	0.033	0.089	396.392	0.091	0.019	2003.02	0
101	2004	10	20	396.34	-0.0065	18	0.037	0.130	396.507	0.093	0.025	2004.8	0	2004.81	396.523	0.026	3	0.034	0.06
101	2004	10	21	396.31	-0.0079	24	0.037	0.205	396.553	0.095	0.032	2004.81	0
101	2004	10	22	396.37	-0.0079	11	0.037	0.103	396.51	0.093	0.025	2004.81	0
101	2006	12	11	396.33	-0.0046	13	0.037	0.069	396.436	0.091	0.017	2006.95	0	2006.95	396.409	0.061	2	0.011	0.065
101	2006	12	12	396.31	-0.0026	11	0.037	0.034	396.381	0.09	0.012	2006.95	0
101	2009	10	8	396.42	-0.00393	33	0.037	0.145	396.603	0.093	0.027	2009.77	0	2009.78	396.575	0.042	3	0.023	0.058
101	2009	10	9	396.32	-0.00369	42	0.037	0.170	396.527	0.093	0.028	2009.77	0
101	2009	10	17	396.39	-0.00351	44	0.037	0.168	396.596	0.093	0.027	2009.8	0
101	2012	12	7	396.3	-0.0029	39	0.037	0.125	396.462	0.092	0.022	2012.94	0	2012.95	396.504	0.059	4	0.02	0.059
101	2012	12	10	396.39	-0.0042	31	0.037	0.147	396.574	0.093	0.028	2012.94	0
101	2012	12	11	396.37	-0.0035	31	0.037	0.123	396.53	0.092	0.024	2012.95	0
101	2012	12	13	396.28	-0.0032	37	0.037	0.131	396.449	0.092	0.024	2012.95	0
101	2015	6	22	396.236	-0.0029	57	0.037	0.177	396.45	0.106	0.093	0.03	0	2015.48	396.486	0.045	3	0.023	0.058
101	2015	6	23	396.239	-0.0029	63	0.037	0.194	396.471	0.107	0.093	0.03	0
101	2015	6	26	396.314	-0.0028	62	0.037	0.185	396.536	0.106	0.093	0.0267897	0
102	1996	12	8	304.42	-0.0055	23	0.016	0.137	304.573	0.08	0.023	1996.94	0	1997.11	304.543	0.084	2	0.03	0.076
102	1996	12	11	304.37	-0.00532	22	0.016	0.128	304.514	0.079	0.022	1996.95	0
102	1998	8	31	304.31	-0.0065	15	0.016	0.104	304.436	0.082	0.031	1998.67	0	1998.68	304.594	0.13	5	0.03	0.075
102	1998	9	3	304.5	-0.00643	15	0.016	0.109	304.625	0.082	0.031	1998.67	0
102	1998	9	4	304.53	-0.00667	27	0.016	0.194	304.74	0.082	0.029	1998.68	0
102	1998	9	10	304.58	-0.005	16	0.016	0.099	304.686	0.08	0.026	1998.69	0
102	1998	9	10	304.32	-0.00747	18	0.016	0.139	304.485	0.086	0.039	1998.69	0
102	2000	2	22	304.44	-0.0024	30	0.02	0.077	304.537	0.077	0.014	2000.14	0	2000.15	304.511	0.101	2	0.017	0.082
102	2000	2	23	304.39	-0.00311	22	0.02	0.075	304.485	0.078	0.015	2000.15	0
102	2001	8	14	304.42	-0.00172	21	0.02	0.040	304.48	0.077	0.011	2001.62	0	2001.62	304.451	0.04	3	0.009	0.044
102	2001	8	15	304.42	-0.00132	19	0.02	0.028	304.468	0.077	0.009	2001.62	0
102	2001	8	16	304.36	-0.00112	20	0.02	0.025	304.405	0.077	0.009	2001.63	0
102	2003	1	16	304.3	-0.004	15	0.02	0.068	304.388	0.078	0.016	2003.04	0	2003.36	304.423	0.056	8	0.019	0.046
102	2003	1	16	304.41	-0.0038	16	0.02	0.068	304.498	0.078	0.016	2003.04	0
102	2003	1	17	304.33	-0.0033	17	0.02	0.063	304.413	0.077	0.015	2003.05	0
102	2003	4	6	304.25	-0.005	17	0.02	0.095	304.365	0.079	0.02	2003.27	0
102	2003	4	6	304.26	-0.0039	17	0.02	0.074	304.354	0.078	0.016	2003.27	0
102	2003	7	28	304.31	-0.0056	11	0.02	0.058	304.403	0.08	0.024	2003.58	0
102	2003	8	2	304.36	-0.00679	11	0.02	0.088	304.468	0.079	0.023	2003.59	0
102	2003	10	12	304.39	-0.00543	13	0.02	0.081	304.492	0.079	0.02	2003.78	0
102	2007	1	4	304.25	-0.0046	17	0.022	0.087	304.36	0.078	0.018	2007.01	0	2007.01	304.36	0.061	1	0.014	0.072
102	2009	10	1	304.36	-0.00257	37	0.022	0.105	304.488	0.079	0.02	2009.75	0	2009.75	304.488	0.077	1	0.016	0.087
102	2012	7	11	304.42	-0.0036	40	0.022	0.158	304.601	0.081	0.027	2012.53	0	2012.66	304.537	0.082	5	0.019	0.055
102	2012	7	12	304.44	-0.0032	40	0.022	0.141	304.603	0.08	0.024	2012.53	0
102	2012	7	27	304.43	-0.003	39	0.022	0.129	304.581	0.079	0.023	2012.57	0
102	2013	3	14	304.29	-0.003	33	0.022	0.111	304.423	0.079	0.022	2013.21	0
102	2013	3	15	304.35	-0.0026	37	0.022	0.107	304.479	0.079	0.02	2013.21	0
102	2015	7	1	304.339	-0.002	61	0.022	0.130	304.491	0.079	0.02	2015.5	0	2015.51	304.507	0.104	4	0.016	0.065
102	2015	7	7	304.517	-0.002	54	0.022	0.116	304.655	0.078	0.019	2015.52	0
102	2015	7	8	304.235	-0.0019	77	0.022	0.154	304.411	0.079	0.022	2015.52	0
102	2015	7	9	304.347	-0.0023	41	0.022	0.104	304.473	0.078	0.019	2015.52	0
103	2002	12	5	353.15	-0.0024	15	0.027	0.041	353.217	0.084	0.012	2002.93	0	2003.04	353.284	0.058	3	0.015	0.056
103	2002	12	9	353.23	-0.0037	14	0.027	0.059	353.316	0.084	0.015	2002.94	0
103	2003	4	2	353.22	-0.0043	15	0.027	0.073	353.32	0.085	0.017	2003.26	0
103	2004	8	16	353.21	-0.0057	16	0.03	0.103	353.342	0.086	0.021	2004.63	0	2004.63	353.427	0.071	4	0.037	0.066
103	2004	8	18	353.17	-0.0085	22	0.03	0.149	353.404	0.097	0.05	2004.63	0
103	2004	8	18	353.25	-0.01	21	0.03	0.133	353.51	0.1	0.056	2004.63	0
103	2004	8	20	353.31	-0.0039	27	0.03	0.113	353.453	0.085	0.019	2004.64	0
103	2006	12	1	353.31	-0.0052	11	0.03	0.068	353.408	0.085	0.018	2006.92	0	2006.94	353.343	0.057	3	0.013	0.055
103	2006	12	13	353.2	-0.0051	12	0.03	0.071	353.301	0.085	0.018	2006.95	0
103	2006	12	14	353.23	-0.0034	16	0.03	0.061	353.321	0.084	0.015	2006.96	0
103	2009	9	1	353.17	-0.0022	40	0.03	0.097	353.297	0.085	0.018	2009.67	0	2009.68	353.321	0.077	2	0.017	0.071
103	2009	9	2	353.18	-0.00315	39	0.03	0.135	353.345	0.086	0.024	2009.67	0
105	1996	9	18	369.41	-0.0054	28	0.024	0.162	369.596	0.089	0.025	1996.72	0	1996.87	369.54	0.087	4	0.034	0.071
105	1996	11	14	369.27	-0.0089	13	0.024	0.134	369.427	0.09	0.029	1996.87	0
105	1996	11	14	369.41	-0.0116	14	0.024	0.186	369.619	0.093	0.037	1996.87	0
105	1997	1	6	369.4	-0.0053	16	0.024	0.095	369.519	0.088	0.02	1997.02	0
105	1998	8	11	369.35	-0.01075	10	0.024	0.129	369.503	0.091	0.032	1998.61	0	1998.77	369.554	0.166	3	0.049	0.116
105	1998	8	11	369.15	-0.01297	17	0.023	0.143	369.42	0.106	0.062	1998.61	0
105	1998	8	28	369.47	-0.00948	24	0.024	0.247	369.74	0.093	0.038	1998.66	0
105	2000	1	10	369.24	-0.00352	18	0.029	0.070	369.339	0.087	0.016	2000.03	0	2000.08	369.502	0.156	5	0.019	0.085
105	2000	1	10	369.2	-0.00397	22	0.029	0.095	369.324	0.087	0.018	2000.03	0
105	2000	2	8	369.51	-0.00326	18	0.029	0.065	369.604	0.087	0.015	2000.11	0
105	2000	2	9	369.52	-0.00353	18	0.029	0.071	369.62	0.087	0.016	2000.11	0
105	2000	2	16	369.49	-0.00469	20	0.029	0.103	369.622	0.088	0.02	2000.13	0
105	2001	4	23	369.56	-0.00329	19	0.029	0.069	369.658	0.087	0.015	2001.31	0	2001.35	369.509	0.138	4	0.018	0.084
105	2001	4	24	369.45	-0.0039	28	0.029	0.117	369.596	0.088	0.02	2001.32	0
105	2001	5	20	369.28	-0.00233	33	0.029	0.082	369.391	0.087	0.015	2001.39	0
105	2001	5	21	369.32	-0.00172	23	0.029	0.043	369.392	0.086	0.011	2001.39	0
105	2002	12	3	369.38	-0.0039	17	0.029	0.074	369.483	0.087	0.016	2002.92	0	2003.05	369.474	0.026	3	0.02	0.051
105	2003	1	31	369.38	-0.005	15	0.029	0.085	369.494	0.087	0.019	2003.08	0
105	2003	4	3	369.33	-0.0043	18	0.029	0.086	369.445	0.087	0.018	2003.26	0
105	2004	8	9	369.35	-0.011	11	0.033	0.063	369.526	0.095	0.043	2004.61	0	2004.61	369.571	0.044	3	0.039	0.064
105	2004	8	9	369.41	-0.0114	13	0.033	0.071	369.614	0.098	0.048	2004.61	0
105	2004	8	10	369.41	-0.01	11	0.033	0.084	369.573	0.094	0.039	2004.61	0
105	2006	10	16	369.38	-0.0055	17	0.033	0.105	369.517	0.088	0.021	2006.79	0	2006.8	369.537	0.061	2	0.018	0.064
105	2006	10	17	369.41	-0.006	17	0.033	0.114	369.557	0.088	0.023	2006.8	0
105	2009	9	4	369.49	-0.00373	43	0.033	0.175	369.698	0.09	0.028	2009.68	0	2009.69	369.572	0.115	3	0.021	0.082
105	2009	9	8	369.32	-0.00242	46	0.033	0.121	369.474	0.088	0.021	2009.69	0
105	2009	9	9	369.33	-0.00283	60	0.033	0.181	369.544	0.089	0.027	2009.69	0
105	2012	7	3	369.328	-0.0028	61	0.033	0.182	369.543	0.089	0.027	2012.51	0	2012.51	369.573	0.078	3	0.022	0.067
105	2012	7	5	369.301	-0.0027	63	0.033	0.181	369.514	0.089	0.026	2012.51	0
105	2012	7	6	369.445	-0.00311	55	0.033	0.183	369.661	0.09	0.027	2012.52	0
105	2015	4	27	369.316	-0.00306	44	0.033	0.147	369.495	0.089	0.024	2015.32	0	2015.33	369.521	0.037	3	0.021	0.053
105	2015	4	28	369.304	-0.0033	47	0.033	0.168	369.505	0.089	0.027	2015.33	0
105	2015	4	29	369.374	-0.0029	50	0.033	0.157	369.563	0.089	0.025	2015.33	0
106	1996	12	7	412.05	-0.0072	15	0.029	0.122	412.202	0.095	0.025	1996.94	0	1996.96	412.099	0.103	3	0.024	0.081
106	1996	12	7	411.98	-0.0049	16	0.029	0.088	412.098	0.093	0.019	1996.94	0
106	1997	1	4	411.88	-0.0049	16	0.029	0.088	411.997	0.093	0.019	1997.01	0
106	1998	8	18	411.87	-0.0042	18	0.029	0.157	411.983	0.095	0.024	1998.63	0	1998.69	412.216	0.209	3	0.027	0.133
106	1998	9	18	412.15	-0.0053	16	0.029	0.178	412.275	0.096	0.027	1998.72	0
106	1998	9	18	412.2	-0.01	14	0.029	0.160	412.389	0.102	0.044	1998.72	0
106	2000	1	14	412.27	-0.004	18	0.036	0.080	412.386	0.093	0.017	2000.04	0	2000.43	412.325	0.064	3	0.019	0.064
106	2000	1	14	412.21	-0.00384	20	0.036	0.084	412.33	0.093	0.017	2000.04	0
106	2000	1	14	412.15	-0.00345	19	0.036	0.073	412.258	0.093	0.016	2000.04	0
106	2001	8	9	412.26	-0.00218	32						2001.61	1	2001.62	412.211	0.145	3	0.016	0.098
106	2001	8	9	412.23	-0.00303	29	0.036	0.094	412.36	0.093	0.017	2001.61	0
106	2001	8	9	411.99	-0.00204	20	0.036	0.045	412.07	0.092	0.011	2001.61	0
106	2001	9	3	412.1	-0.00188	34	0.036	0.068	412.203	0.092	0.013	2001.67	0
106	2003	1	7	411.97	-0.007	17	0.036	0.133	412.139	0.095	0.026	2003.02	0	2003.15	412.161	0.018	4	0.025	0.056
106	2003	3	5	412.05	-0.0055	15	0.036	0.094	412.179	0.094	0.02	2003.18	0
106	2003	3	11	412.04	-0.0047	15	0.036	0.080	412.156	0.093	0.018	2003.2	0
106	2003	3	17	412.01	-0.0042	28	0.036	0.126	412.172	0.094	0.021	2003.21	0
106	2004	10	27	412	-0.0082	17	0.04	0.156	412.196	0.096	0.029	2004.82	0	2004.82	412.206	0.013	2	0.039	0.063
106	2004	10	28	411.99	-0.0074	23	0.04	0.185	412.215	0.096	0.03	2004.83	0
106	2006	12	15	412.09	-0.0073	11	0.04	0.095	412.225	0.095	0.024	2006.96	0	2006.96	412.234	0.061	2	0.019	0.068
106	2006	12	16	412.1	-0.006	15	0.04	0.102	412.242	0.094	0.022	2006.96	0
106	2009	10	6	412.11	-0.00363	32	0.04	0.131	412.281	0.095	0.025	2009.77	0	2009.78	412.275	0.124	3	0.022	0.089
106	2009	10	7	412	-0.00287	34	0.04	0.109	412.149	0.094	0.021	2009.77	0
106	2009	10	14	412.16	-0.00456	39	0.04	0.196	412.396	0.097	0.032	2009.79	0
106	2012	12	17	412.06	-0.0033	36	0.04	0.132	412.232	0.095	0.024	2012.96	0	2012.98	412.254	0.044	4	0.02	0.057
106	2012	12	19	412.11	-0.0032	36	0.04	0.128	412.278	0.094	0.023	2012.97	0
106	2012	12	26	412.13	-0.0033	36	0.04	0.132	412.302	0.095	0.024	2012.99	0
106	2012	12	28	412.02	-0.0035	37	0.04	0.144	412.204	0.095	0.025	2012.99	0
106	2015	7	10	411.927	-0.0029	62	0.04	0.191	412.159	0.096	0.028	2015.53	0	2015.75	412.254	0.098	7	0.023	0.066
106	2015	7	13	411.978	-0.0029	68	0.04	0.209	412.227	0.096	0.029	2015.54	0
106	2015	7	14	411.853	-0.0027	77	0.04	0.219	412.112	0.096	0.03	2015.54	0
106	2015	11	6	412.125	-0.0037	33	0.04	0.137	412.302	0.095	0.025	2015.85	0
106	2015	12	1	412.242	-0.0039	28	0.04	0.125	412.407	0.095	0.025	2015.92	0
106	2015	12	2	412.089	-0.0039	38	0.04	0.164	412.293	0.096	0.028	2015.92	0
106	2015	12	7	412.118	-0.0036	30	0.04	0.122	412.281	0.095	0.024	2015.94	0
107	1996	11	22	453.4	-0.00751	17	0.036	0.143	453.578	0.101	0.027	1996.89	0	1996.98	453.374	0.227	7	0.031	0.106
107	1996	11	23	452.73	-0.0124	13	0.035	0.186	452.951	0.105	0.038	1996.9	0
107	1996	12	16	453.22	-0.00601	19	0.035	0.126	453.382	0.1	0.023	1996.96	0
107	1997	1	10	453.39	-0.0075	15	0.036	0.128	453.553	0.101	0.026	1997.03	0
107	1997	1	10	453.38	-0.0071	16	0.036	0.128	453.543	0.101	0.025	1997.03	0
107	1997	1	11	453.24	-0.00613	18	0.035	0.123	453.398	0.1	0.023	1997.03	0
107	1997	1	12	453.09	-0.0048	16	0.035	0.086	453.212	0.099	0.019	1997.03	0
107	1998	8	19	453.28	-0.01239	15	0.035	0.120	453.526	0.112	0.055	1998.64	0	1998.81	453.432	0.104	3	0.039	0.09
107	1998	8	19	453.27	-0.009	14	0.035	0.144	453.449	0.102	0.03	1998.64	0
107	1998	9	22	453.15	-0.00753	16	0.035	0.160	453.321	0.104	0.037	1998.73	0
107	2000	1	19	453.16	-0.0045	22	0.043	0.108	453.311	0.099	0.02	2000.05	0	2000.07	453.224	0.153	5	0.022	0.09
107	2000	1	20	453.2	-0.00379	22	0.043	0.091	453.334	0.099	0.017	2000.05	0
107	2000	1	20	453.1	-0.00385	21	0.043	0.089	453.231	0.099	0.017	2000.05	0
107	2000	2	7	452.82	-0.00462	19	0.043	0.097	452.959	0.099	0.019	2000.1	0
107	2000	2	8	453.15	-0.0043	19	0.043	0.090	453.283	0.099	0.018	2000.11	0
107	2001	5	26	452.99	-0.005	50						2001.4	1	2001.42	453.119	0.075	2	0.027	0.08
107	2001	6	3	452.96	-0.00389	22	0.043	0.093	453.096	0.099	0.018	2001.42	0
107	2001	6	4	452.94	-0.00387	39	0.043	0.159	453.141	0.1	0.023	2001.43	0
107	2002	11	29	453.03	-0.0074	14	0.043	0.118	453.191	0.101	0.025	2002.91	0	2003.01	453.152	0.07	3	0.032	0.075
107	2002	12	31	453	-0.0101	13	0.043	0.152	453.194	0.102	0.032	2003	0
107	2003	2	14	452.91	-0.0063	17	0.043	0.120	453.072	0.1	0.023	2003.12	0
107	2004	10	29	453	-0.0083	12	0.049	0.116	453.165	0.101	0.027	2004.83	0	2004.84	453.206	0.041	3	0.035	0.068
107	2004	11	2	453.02	-0.0087	14	0.049	0.139	453.208	0.102	0.029	2004.84	0
107	2004	11	3	453.03	-0.0093	16	0.049	0.167	453.246	0.102	0.032	2004.84	0
107	2006	11	14	453.08	-0.0065	14	0.049	0.104	453.233	0.1	0.023	2006.87	0	2006.92	453.181	0.075	3	0.018	0.071
107	2006	11	15	453.07	-0.006	14	0.049	0.096	453.215	0.1	0.021	2006.87	0
107	2007	1	10	452.96	-0.0062	12	0.049	0.087	453.095	0.1	0.021	2007.03	0
107	2009	9	18	453.11	-0.00427	42	0.049	0.196	453.355	0.102	0.031	2009.72	0	2009.72	453.285	0.077	2	0.024	0.08
107	2009	9	22	453.02	-0.00365	36	0.049	0.146	453.215	0.101	0.026	2009.73	0
107	2013	1	9	453.1	-0.0042	32	0.049	0.151	453.3	0.101	0.028	2013.02	0	2013.03	453.273	0.046	3	0.022	0.064
107	2013	1	11	453.02	-0.0037	37	0.049	0.152	453.22	0.101	0.027	2013.03	0
107	2013	1	15	453.11	-0.0038	33	0.049	0.141	453.299	0.101	0.026	2013.04	0
107	2015	7	20	452.93	-0.0033	60	0.049	0.211	453.19	0.102	0.03	2015.55	0	2015.69	453.203	0.04	6	0.025	0.062
107	2015	7	21	452.9	-0.0034	52	0.049	0.190	453.139	0.101	0.029	2015.56	0
107	2015	7	22	452.92	-0.0031	69	0.049	0.226	453.195	0.102	0.031	2015.56	0
107	2015	10	22	452.938	-0.0033	65	0.049	0.228	453.214	0.102	0.032	2015.81	0
107	2015	10	28	453.029	-0.0037	45	0.049	0.181	453.259	0.101	0.029	2015.83	0
107	2015	10	30	452.975	-0.0037	49	0.049	0.196	453.22	0.102	0.03	2015.83	0
110	1996	11	16	246.56	-0.0073	12	0.011	0.102	246.673	0.072	0.024	1996.88	0	1996.94	246.673	0.084	1	0.027	0.093
110	1998	9	14	246.6	-0.0017	16	0.011	0.092	246.641	0.069	0.012	1998.71	0	1998.71	246.725	0.092	3	0.03	0.068
110	1998	9	15	246.63	-0.01222	13	0.011	0.087	246.824	0.085	0.051	1998.71	0
110	1998	9	16	246.56	-0.0088	14	0.011	-0.088	246.711	0.078	0.039	1998.71	0
110	1999	12	8	246.83	-0.00195	21	0.011	0.045	246.885	0.069	0.011	1999.94	0
110	1999	12	9	246.8	-0.00216	21	0.011	0.050	246.86	0.069	0.012	1999.94	0
110	2000	1	26	246.78	-0.00201	18	0.013	0.040	246.834	0.069	0.011	2000.07	0	2000.07	246.834	0.101	1	0.01	0.106
110	2001	8	18	246.69	-0.00142	28	0.013	0.043	246.746	0.069	0.01	2001.63	0	2001.64	246.783	0.032	3	0.009	0.036
110	2001	8	19	246.75	-0.0016	21	0.013	0.037	246.8	0.069	0.01	2001.64	0
110	2001	8	20	246.76	-0.00145	18	0.013	0.029	246.802	0.068	0.009	2001.64	0
110	2003	1	23	246.62	-0.0037	16	0.013	0.067	246.7	0.07	0.016	2003.06	0	2003.07	246.699	0.009	3	0.014	0.033
110	2003	1	24	246.65	-0.0021	19	0.013	0.044	246.708	0.069	0.011	2003.07	0
110	2003	1	27	246.62	-0.003	17	0.013	0.057	246.69	0.069	0.014	2003.07	0
110	2004	11	4	246.65	-0.004	14	0.015	0.064	246.729	0.07	0.016	2004.84	0	2004.85	246.755	0.043	2	0.018	0.046
110	2004	11	5	246.7	-0.0055	10	0.015	0.066	246.781	0.07	0.019	2004.85	0
110	2006	12	20	246.53	-0.0028	15	0.015	0.048	246.593	0.069	0.013	2006.97	0	2006.99	246.676	0.074	3	0.01	0.053
110	2006	12	28	246.67	-0.0025	18	0.015	0.050	246.735	0.069	0.013	2006.99	0
110	2007	1	8	246.63	-0.004	12	0.015	0.056	246.701	0.07	0.016	2007.02	0
110	2010	2	3	246.53	-0.00277	21	0.015	0.069	246.614	0.07	0.018	2010.09	0	2010.11	246.65	0.056	3	0.013	0.046
110	2010	2	11	246.53	-0.0023	29	0.015	0.076	246.621	0.07	0.017	2010.11	0
110	2010	2	12	246.63	-0.00227	27	0.015	0.070	246.715	0.07	0.017	2010.12	0
110	2010	2	18	246.68	-0.00234	31	0.015	0.082	246.777	0.07	0.018	2010.13	0
110	2012	8	21	246.51	-0.0026	48	0.015	0.135	246.66	0.071	0.022	2012.64	0	2012.65	246.769	0.113	4	0.017	0.066
110	2012	8	22	246.56	-0.0022	48	0.015	0.114	246.689	0.071	0.02	2012.64	0
110	2012	8	24	246.75	-0.0022	55	0.015	0.130	246.895	0.071	0.021	2012.65	0
110	2012	8	27	246.69	-0.0023	51	0.015	0.127	246.832	0.071	0.021	2012.66	0
110	2015	5	29	246.629	-0.0018	42	0.015	0.083	246.727	0.07	0.016	2015.41	0	2015.42	246.692	0.034	4	0.013	0.036
110	2015	6	1	246.531	-0.002	46	0.015	0.100	246.646	0.07	0.018	2015.42	0
110	2015	6	2	246.578	-0.0017	60	0.015	0.109	246.702	0.07	0.018	2015.42	0
110	2015	6	3	246.587	-0.0019	45	0.015	0.093	246.695	0.07	0.017	2015.42	0
111	1996	8	29	323.82	-0.003	28	0.018	0.090	323.928	0.08	0.016	1996.66	0	1996.75	324.077	0.146	5	0.02	0.078
111	1996	9	3	323.84	-0.0032	18	0.018	0.064	323.922	0.08	0.015	1996.67	0
111	1996	9	5	324.12	-0.0045	23	0.018	0.113	324.251	0.081	0.02	1996.68	0
111	1996	9	9	324.05	-0.0023	25	0.018	0.062	324.13	0.08	0.013	1996.69	0
111	1997	1	16	324.04	-0.0049	18	0.018	0.098	324.156	0.081	0.02	1997.04	0
111	1998	9	2	323.85	-0.00715	21	0.018	0.132	324.033	0.089	0.042	1998.67	0	1998.69	324.049	0.086	4	0.037	0.069
111	1998	9	2	323.97	-0.00773	20	0.018	0.125	324.158	0.09	0.043	1998.67	0
111	1998	9	10	323.78	-0.00788	17	0.018	0.150	323.948	0.084	0.028	1998.69	0
111	1998	9	11	323.89	-0.01056	12	0.018	0.097	324.056	0.09	0.043	1998.7	0
111	2000	1	4	324.11	-0.00261	20	0.023	0.057	324.19	0.08	0.013	2000.01	0	2000.05	324.243	0.127	4	0.015	0.076
111	2000	1	5	324.28	-0.0027	18	0.023	0.054	324.357	0.08	0.013	2000.01	0
111	2000	1	5	324.25	-0.00313	18	0.023	0.063	324.335	0.08	0.014	2000.01	0
111	2000	2	24	323.99	-0.0027	26	0.023	0.075	324.088	0.08	0.015	2000.15	0
111	2001	6	5	323.97	-0.00311	41	0.023	0.134	324.126	0.081	0.02	2001.43	0	2001.59	324.126	0.099	5	0.021	0.062
111	2001	8	16	323.93	-0.00193	50	0.023	0.100	324.053	0.08	0.016	2001.63	0
111	2001	8	17	324.19	-0.00181	44	0.023	0.083	324.296	0.08	0.014	2001.63	0
111	2001	8	17	323.98	-0.00182	43	0.023	0.082	324.085	0.08	0.014	2001.63	0
111	2001	8	17	323.96	-0.00181	47	0.023	0.089	324.071	0.08	0.015	2001.63	0
111	2003	1	31	324.01	-0.0034	16	0.023	0.061	324.094	0.08	0.015	2003.08	0	2003.17	324.068	0.079	4	0.015	0.057
111	2003	2	21	324.08	-0.0038	15	0.023	0.065	324.167	0.08	0.016	2003.14	0
111	2003	3	6	323.93	-0.0021	17	0.023	0.040	323.992	0.08	0.011	2003.18	0
111	2003	4	3	323.92	-0.0042	16	0.023	0.076	324.018	0.081	0.017	2003.26	0
111	2004	10	8	324	-0.0054	17	0.025	0.103	324.128	0.082	0.021	2004.77	0	2004.78	324.112	0.042	3	0.025	0.052
111	2004	10	11	324.01	-0.0054	18	0.025	0.108	324.143	0.082	0.021	2004.78	0
111	2004	10	12	323.93	-0.0064	15	0.025	0.109	324.064	0.082	0.023	2004.78	0
111	2006	10	31	324.09	-0.0064	14	0.025	0.102	324.218	0.082	0.023	2006.83	0	2006.85	324.147	0.061	2	0.017	0.06
111	2006	11	9	323.94	-0.0048	21	0.025	0.110	324.076	0.081	0.02	2006.86	0
111	2009	9	23	324.02	-0.00272	42	0.025	0.125	324.17	0.082	0.022	2009.73	0	2009.73	324.139	0.077	2	0.016	0.069
111	2009	9	24	323.98	-0.00243	38	0.025	0.102	324.107	0.081	0.019	2009.73	0
111	2012	8	28	324.04	-0.0036	49	0.025	0.191	324.256	0.084	0.029	2012.66	0	2012.81	324.228	0.115	6	0.021	0.065
111	2012	8	31	324.13	-0.0036	45	0.025	0.176	324.332	0.084	0.028	2012.67	0
111	2012	9	7	324.14	-0.0033	45	0.025	0.162	324.327	0.083	0.026	2012.69	0
111	2012	9	19	324.07	-0.0039	45	0.025	0.191	324.286	0.084	0.03	2012.72	0
111	2013	2	13	323.95	-0.0029	31	0.025	0.102	324.077	0.082	0.021	2013.12	0
111	2013	2	15	323.95	-0.0028	37	0.025	0.115	324.09	0.082	0.021	2013.12	0
111	2015	5	6	324.022	-0.0027	39	0.025	0.116	324.163	0.082	0.021	2015.35	0	2015.36	324.158	0.101	3	0.017	0.072
111	2015	5	8	324.104	-0.0025	47	0.025	0.128	324.257	0.082	0.021	2015.36	0
111	2015	5	12	323.887	-0.0023	58	0.025	0.143	324.055	0.082	0.022	2015.37	0
121	1996	9	8	349.21	-0.0068	21	0.021	0.156	349.387	0.087	0.027	1996.69	0	1996.88	349.474	0.066	4	0.03	0.061
121	1996	9	10	349.31	-0.00655	21	0.021	0.151	349.482	0.086	0.026	1996.69	0
121	1997	1	4	349.37	-0.0053	15	0.021	0.090	349.481	0.085	0.02	1997.01	0
121	1997	1	5	349.41	-0.0061	17	0.021	0.116	349.547	0.086	0.023	1997.01	0
121	1998	8	13	349.37	-0.00833	14	0.021	0.142	349.524	0.091	0.038	1998.62	0	1998.64	349.487	0.033	3	0.026	0.053
121	1998	8	14	349.35	-0.00488	16	0.021	0.130	349.459	0.086	0.026	1998.62	0
121	1998	9	9	349.36	-0.00575	15	0.021	0.098	349.479	0.085	0.021	1998.69	0
121	2000	1	28	349.45	-0.00306	19	0.026	0.064	349.54	0.084	0.014	2000.08	0	2000.08	349.56	0.054	3	0.015	0.054
121	2000	1	29	349.53	-0.0031	19	0.026	0.065	349.621	0.084	0.015	2000.08	0
121	2000	1	31	349.43	-0.0033	17	0.026	0.063	349.519	0.084	0.015	2000.08	0
121	2001	5	15	349.38	-0.00286	33	0.026	0.100	349.506	0.084	0.017	2001.37	0	2001.39	349.53	0.046	3	0.024	0.055
121	2001	5	15	349.43	-0.00318	38	0.026	0.127	349.583	0.085	0.02	2001.37	0
121	2001	6	5	349.37	-0.003	33	0.026	0.105	349.501	0.084	0.017	2001.43	0
121	2002	12	4	349.45	-0.0035	16	0.026	0.063	349.539	0.084	0.015	2002.93	0	2002.94	349.465	0.064	3	0.016	0.058
121	2002	12	10	349.34	-0.0044	14	0.026	0.070	349.436	0.084	0.017	2002.94	0
121	2002	12	16	349.35	-0.005	7	0.026	0.045	349.421	0.084	0.017	2002.96	0
121	2006	11	7	349.37	-0.0053	20	0.029	0.117	349.516	0.085	0.022	2006.85	0	2006.86	349.504	0.061	2	0.016	0.062
121	2006	11	8	349.38	-0.0051	14	0.029	0.082	349.491	0.085	0.019	2006.86	0
121	2009	9	10	349.38	-0.00244	39	0.029	0.105	349.514	0.085	0.02	2009.69	0	2009.73	349.514	0.077	1	0.015	0.089
121	2012	10	12	349.48	-0.0036	40	0.029	0.158	349.668	0.087	0.027	2012.78	0	2012.82	349.663	0.07	4	0.024	0.06
121	2012	10	16	349.4	-0.0031	39	0.029	0.133	349.563	0.086	0.023	2012.79	0
121	2012	11	6	349.47	-0.005	40	0.029	0.220	349.719	0.09	0.035	2012.85	0
121	2012	11	9	349.5	-0.0037	43	0.029	0.174	349.703	0.087	0.028	2012.86	0
121	2015	6	12	349.236	-0.0023	70	0.029	0.170	349.435	0.086	0.024	2015.45	0	2015.46	349.434	0.073	5	0.018	0.056
121	2015	6	16	349.155	-0.0024	54	0.029	0.139	349.323	0.085	0.022	2015.46	0
121	2015	6	17	349.321	-0.0025	57	0.029	0.153	349.503	0.086	0.023	2015.46	0
121	2015	6	18	349.239	-0.0019	71	0.029	0.143	349.411	0.085	0.021	2015.47	0
121	2015	6	19	349.36	-0.0026	37	0.029	0.107	349.496	0.085	0.02	2015.47	0
123	1996	11	20	422.8	-0.0129	13	0.031	0.193	423.024	0.101	0.04	1996.89	0	1997.08	423.132	0.073	4	0.037	0.072
123	1996	11	24	422.99	-0.00923	15	0.031	0.157	423.178	0.098	0.031	1996.9	0
123	1997	1	6	423.03	-0.0054	15	0.031	0.092	423.153	0.095	0.02	1997.02	0
123	1997	1	6	422.98	-0.0095	15	0.031	0.162	423.172	0.098	0.032	1997.02	0
123	1998	8	17	422.86	-0.01671	14	0.031	0.121	423.158	0.117	0.07	1998.63	0	1998.82	423.297	0.139	3	0.048	0.106
123	1998	9	20	423.15	-0.00987	10	0.031	0.121	423.299	0.1	0.037	1998.72	0
123	1998	9	21	423.22	-0.0115	14	0.031	0.184	423.435	0.1	0.037	1998.72	0
123	2000	1	17	423.09	-0.00321	24	0.037	0.083	423.211	0.094	0.016	2000.05	0	2000.06	423.35	0.196	2	0.023	0.149
123	2000	1	18	423.33	-0.00417	27	0.037	0.121	423.488	0.095	0.02	2000.05	0
123	2001	6	7	422.96	-0.0037	37	0.037	0.144	423.142	0.095	0.022	2001.44	0	2001.56	423.198	0.113	4	0.035	0.083
123	2001	8	7	423.11	-0.00381	54	0.037	0.213	423.361	0.097	0.028	2001.6	0
123	2001	8	8	422.9	-0.00302	54	0.037	0.169	423.107	0.096	0.023	2001.61	0
123	2001	8	8	423	-0.00249	57	0.037	0.147	423.184	0.095	0.021	2001.61	0
123	2003	2	1	423.09	-0.0062	15	0.037	0.105	423.233	0.096	0.022	2003.09	0	2003.16	423.163	0.086	6	0.023	0.066
123	2003	2	19	422.89	-0.0048	16	0.037	0.086	423.014	0.095	0.019	2003.14	0
123	2003	2	20	423.1	-0.0053	15	0.037	0.090	423.228	0.095	0.02	2003.14	0
123	2003	2	20	422.99	-0.0052	15	0.037	0.088	423.116	0.095	0.02	2003.14	0
123	2003	3	10	423.07	-0.0065	15	0.037	0.111	423.218	0.096	0.023	2003.19	0
123	2003	4	1	423.04	-0.0049	16	0.037	0.088	423.166	0.095	0.019	2003.25	0
123	2004	10	13	423.18	-0.0089	15	0.042	0.151	423.374	0.098	0.03	2004.79	0	2004.79	423.314	0.043	4	0.032	0.063
123	2004	10	14	423.12	-0.0077	14	0.042	0.123	423.286	0.097	0.026	2004.79	0
123	2004	10	14	423.13	-0.0076	12	0.042	0.106	423.279	0.096	0.025	2004.79	0
123	2004	10	15	423.14	-0.0078	15	0.042	0.133	423.315	0.097	0.027	2004.79	0
123	2006	10	26	423.14	-0.0073	19	0.042	0.153	423.336	0.097	0.027	2006.82	0	2006.82	423.336	0.061	1	0.023	0.082
123	2009	9	1	422.95	-0.00308	43	0.042	0.145	423.137	0.096	0.024	2009.67	0	2009.7	423.221	0.118	2	0.021	0.1
123	2009	9	25	423.1	-0.00367	40	0.042	0.161	423.304	0.097	0.027	2009.74	0
123	2013	1	3	423.1	-0.00333	36	0.042	0.133	423.276	0.096	0.024	2013.01	0	2013.01	423.214	0.058	3	0.019	0.064
123	2013	1	4	423.03	-0.0032	37	0.042	0.131	423.204	0.096	0.024	2013.01	0
123	2013	1	8	423	-0.0034	31	0.042	0.119	423.161	0.096	0.023	2013.02	0
123	2015	7	15	422.988	-0.0032	56	0.042	0.192	423.222	0.097	0.028	2015.54	0	2015.54	423.19	0.028	3	0.023	0.058
123	2015	7	16	422.922	-0.0029	67	0.042	0.206	423.17	0.097	0.029	2015.54	0
123	2015	7	17	422.97	-0.0034	45	0.042	0.167	423.179	0.097	0.027	2015.55	0
130	1996	11	16	337.14	-0.0064	9	0.02	0.070	337.23	0.083	0.021	1996.88	0	1996.92	337.27	0.084	2	0.02	0.075
130	1997	1	3	337.2	-0.0031	27	0.02	0.090	337.31	0.082	0.016	1997.01	0
130	1998	9	1	337.51	-0.01268	13	0.02	0.090	337.72	0.096	0.052	1998.67	0	1998.68	337.561	0.14	3	0.046	0.101
130	1998	9	1	337.28	-0.00917	15	0.02	0.132	337.455	0.091	0.042	1998.67	0
130	1998	9	7	337.27	-0.0128	15	0.02	0.123	337.507	0.099	0.057	1998.69	0
130	2000	1	6	337.24	-0.00321	18	0.024	0.064	337.329	0.082	0.015	2000.02	0	2000.02	337.37	0.036	3	0.018	0.049
130	2000	1	6	337.3	-0.00377	17	0.024	0.072	337.396	0.082	0.016	2000.02	0
130	2000	1	7	337.26	-0.0037	25	0.024	0.100	337.384	0.083	0.018	2000.02	0
130	2001	5	5	337.25	-0.00377	41	0.024	0.162	337.437	0.084	0.023	2001.35	0	2001.37	337.397	0.075	2	0.028	0.072
130	2001	5	17	337.23	-0.00205	48	0.024	0.102	337.357	0.082	0.016	2001.38	0
130	2001	5	22	337.26	-0.00275	23	0.024	0.069	337.353	0.082	0.014	2001.39	0
130	2002	12	18	337.29	-0.0057	13	0.024	0.086	337.4	0.083	0.02	2002.97	0	2003.04	337.325	0.072	5	0.019	0.055
130	2002	12	18	337.17	-0.0033	14	0.024	0.053	337.247	0.082	0.014	2002.97	0
130	2002	12	19	337.3	-0.0045	16	0.024	0.081	337.405	0.083	0.018	2002.97	0
130	2003	1	8	337.17	-0.0048	16	0.024	0.086	337.281	0.083	0.019	2003.02	0
130	2003	4	7	337.19	-0.0047	15	0.024	0.080	337.294	0.083	0.018	2003.27	0
130	2004	10	7	337.3	-0.0047	15	0.027	0.080	337.407	0.083	0.018	2004.77	0	2004.77	337.453	0.048	3	0.025	0.055
130	2004	10	7	337.32	-0.006	15	0.027	0.102	337.449	0.084	0.022	2004.77	0
130	2004	10	8	337.35	-0.0066	17	0.027	0.125	337.503	0.084	0.024	2004.77	0
130	2006	10	24	337.23	-0.0047	14	0.027	0.075	337.333	0.083	0.018	2006.82	0	2006.83	337.363	0.061	2	0.014	0.061
130	2006	10	25	337.28	-0.0045	17	0.027	0.086	337.393	0.083	0.018	2006.82	0
130	2009	11	2	337.29	-0.00349	34	0.027	0.133	337.45	0.084	0.025	2009.84	0	2009.86	337.415	0.046	3	0.016	0.051
130	2009	11	5	337.24	-0.00251	34	0.027	0.095	337.363	0.083	0.019	2009.85	0
130	2009	11	19	337.32	-0.00235	32	0.027	0.085	337.432	0.083	0.018	2009.89	0
130	2012	9	24	337.34	-0.0031	49	0.027	0.164	337.532	0.085	0.026	2012.73	0	2012.75	337.51	0.055	3	0.021	0.055
130	2012	9	25	337.26	-0.0029	51	0.027	0.160	337.447	0.085	0.025	2012.74	0
130	2012	10	4	337.38	-0.0034	38	0.027	0.143	337.55	0.085	0.025	2012.76	0
130	2015	6	5	337.333	-0.0027	45	0.027	0.132	337.493	0.084	0.022	2015.43	0	2015.44	337.436	0.055	4	0.018	0.052
130	2015	6	9	337.191	-0.0021	64	0.027	0.143	337.361	0.084	0.022	2015.44	0
130	2015	6	10	337.283	-0.0026	48	0.027	0.135	337.446	0.084	0.022	2015.44	0
130	2015	6	11	337.279	-0.0026	48	0.027	0.135	337.442	0.084	0.022	2015.45	0
132	1997	1	13	521.28	-0.00723	18	0.047	0.145	521.472	0.11	0.027	1997.04	0	1997.04	521.448	0.056	5	0.033	0.075
132	1997	1	13	521.31	-0.00559	23	0.047	0.140	521.497	0.11	0.024	1997.04	0
132	1997	1	14	521.2	-0.00668	19	0.047	0.140	521.387	0.11	0.026	1997.04	0
132	1997	1	14	521.33	-0.0062	17	0.047	0.118	521.495	0.11	0.023	1997.04	0
132	1997	1	15	521.16	-0.00901	18	0.047	0.180	521.387	0.112	0.032	1997.04	0
132	1998	8	19	521.26	-0.01925	10	0.047	0.123	521.538	0.127	0.068	1998.64	0	1998.7	521.671	0.177	4	0.051	0.12
132	1998	8	21	521.4	-0.01359	18	0.047	0.272	521.719	0.126	0.067	1998.64	0
132	1998	9	25	521.38	-0.0062	14	0.047	0.190	521.526	0.111	0.029	1998.74	0
132	1998	9	30	521.64	-0.0134	14	0.047	0.190	521.902	0.121	0.057	1998.75	0
132	1999	12	7	521.31	-0.00407	20	0.047	0.089	521.447	0.109	0.018	1999.94	0	1999.94	521.601	0.218	2	0.022	0.168
132	1999	12	8	521.6	-0.00419	24	0.047	0.109	521.756	0.109	0.019	1999.94	0
132	2001	8	2	521.51	-0.00455	25	0.056	0.123	521.688	0.109	0.021	2001.59	0	2001.62	521.644	0.125	6	0.031	0.086
132	2001	8	3	521.49	-0.00354	56	0.056	0.205	521.751	0.11	0.027	2001.59	0
132	2001	8	6	521.42	-0.00526	27	0.056	0.153	521.628	0.11	0.024	2001.6	0
132	2001	8	20	521.21	-0.00295	45	0.055	0.138	521.404	0.109	0.02	2001.64	0
132	2001	8	21	521.47	-0.003	47	0.056	0.147	521.672	0.109	0.021	2001.64	0
132	2001	8	21	521.55	-0.00236	47	0.056	0.116	521.721	0.109	0.018	2001.64	0
132	2003	2	24	521.46	-0.0063	15	0.056	0.107	521.623	0.109	0.023	2003.15	0	2003.19	521.627	0.077	4	0.028	0.078
132	2003	2	24	521.52	-0.0075	15	0.056	0.128	521.703	0.11	0.026	2003.15	0
132	2003	3	1	521.49	-0.006	17	0.056	0.114	521.66	0.109	0.023	2003.17	0
132	2003	3	30	521.34	-0.0067	17	0.056	0.127	521.523	0.11	0.025	2003.25	0
132	2004	10	22	521.44	-0.0107	12	0.064	0.150	521.654	0.112	0.033	2004.81	0	2004.82	521.663	0.054	3	0.044	0.082
132	2004	10	25	521.36	-0.01	17	0.064	0.190	521.614	0.112	0.034	2004.82	0
132	2004	10	26	521.44	-0.0108	18	0.064	0.216	521.72	0.113	0.037	2004.82	0
132	2006	11	21	521.4	-0.0046	12	0.064	0.064	521.528	0.108	0.017	2006.89	0	2006.93	521.581	0.082	5	0.016	0.074
132	2006	11	22	521.34	-0.0055	14	0.064	0.088	521.492	0.109	0.02	2006.89	0
132	2006	11	27	521.42	-0.0076	15	0.064	0.129	521.613	0.11	0.026	2006.91	0
132	2006	11	28	521.51	-0.0068	17	0.064	0.129	521.703	0.11	0.025	2006.91	0
132	2007	1	11	521.45	-0.0035	14	0.064	0.056	521.57	0.108	0.015	2007.03	0
132	2009	10	22	521.52	-0.00524	34	0.064	0.199	521.783	0.112	0.034	2009.81	0	2009.84	521.67	0.105	3	0.023	0.09
132	2009	11	6	521.46	-0.00307	38	0.064	0.129	521.653	0.11	0.023	2009.85	0
132	2009	11	13	521.37	-0.00328	39	0.064	0.141	521.575	0.11	0.025	2009.87	0
132	2013	1	25	521.32	-0.003	39	0.064	0.129	521.513	0.109	0.023	2013.07	0	2013.09	521.599	0.065	4	0.022	0.074
132	2013	1	31	521.37	-0.004	36	0.064	0.160	521.594	0.111	0.028	2013.08	0
132	2013	2	7	521.44	-0.00403	37	0.064	0.165	521.669	0.111	0.028	2013.1	0
132	2013	2	8	521.39	-0.00403	37	0.064	0.165	521.619	0.111	0.028	2013.1	0
132	2015	4	16	521.407	-0.0046	42	0.064	0.212	521.683	0.112	0.033	2015.29	0	2015.3	521.669	0.072	4	0.029	0.077
132	2015	4	17	521.318	-0.0044	50	0.064	0.238	521.62	0.113	0.035	2015.3	0
132	2015	4	20	521.503	-0.0046	39	0.064	0.198	521.765	0.112	0.032	2015.3	0
132	2015	4	21	521.333	-0.0046	42	0.064	0.212	521.609	0.112	0.033	2015.31	0
136	1996	9	3	381.23	-0.0041	24	0.025	0.107	381.362	0.089	0.019	1996.67	0	1996.9	381.401	0.105	4	0.035	0.078
136	1996	9	13	381.08	-0.00498	33	0.025	0.174	381.28	0.091	0.026	1996.7	0
136	1996	9	13	381.31	-0.00637	28	0.025	0.191	381.526	0.092	0.029	1996.7	0
136	1996	11	12	381.26	-0.0094	14	0.025	0.150	381.435	0.092	0.031	1996.87	0
136	1998	8	12	381.42	-0.01201	14	0.025	0.118	381.637	0.101	0.052	1998.62	0	1998.75	381.659	0.119	4	0.047	0.088
136	1998	8	13	381.62	-0.011	13	0.025	0.128	381.81	0.099	0.046	1998.62	0
136	1998	8	15	381.42	-0.0132	15	0.025	0.113	381.669	0.105	0.059	1998.62	0
136	1998	8	28	381.31	-0.011	15	0.025	0.160	381.522	0.1	0.05	1998.66	0
136	2000	1	21	381.44	-0.00352	20	0.031	0.078	381.548	0.089	0.016	2000.06	0	2000.07	381.463	0.076	3	0.02	0.066
136	2000	1	24	381.32	-0.00426	18	0.031	0.085	381.436	0.089	0.018	2000.07	0
136	2000	1	24	381.28	-0.00373	23	0.031	0.093	381.404	0.089	0.018	2000.07	0
136	2001	4	20	381.39	-0.00357	44	0.031	0.164	381.585	0.09	0.023	2001.3	0	2001.35	381.534	0.041	4	0.028	0.057
136	2001	5	7	381.37	-0.00421	33	0.031	0.148	381.548	0.09	0.023	2001.35	0
136	2001	5	8	381.38	-0.00297	32	0.031	0.101	381.512	0.089	0.017	2001.36	0
136	2001	5	23	381.35	-0.00333	31	0.031	0.110	381.491	0.089	0.018	2001.4	0
136	2002	12	13	381.31	-0.0054	14	0.031	0.086	381.427	0.089	0.02	2002.95	0	2003.03	381.402	0.034	4	0.018	0.052
136	2002	12	13	381.27	-0.003	15	0.031	0.051	381.352	0.088	0.013	2002.95	0
136	2002	12	16	381.31	-0.0046	15	0.031	0.078	381.419	0.089	0.018	2002.96	0
136	2003	4	2	381.3	-0.0043	17	0.031	0.082	381.412	0.089	0.018	2003.26	0
136	2004	8	6	381.33	-0.00714	13	0.035	0.097	381.472	0.093	0.032	2004.6	0	2004.6	381.5	0.089	3	0.041	0.08
136	2004	8	7	381.24	-0.0119	11	0.035	0.090	381.429	0.098	0.046	2004.6	0
136	2004	8	8	381.37	-0.0163	10	0.035	0.083	381.6	0.105	0.058	2004.61	0
136	2006	10	11	381.33	-0.0064	17	0.035	0.122	381.486	0.09	0.024	2006.78	0	2006.78	381.524	0.053	2	0.02	0.062
136	2006	10	12	381.39	-0.0065	19	0.035	0.137	381.561	0.091	0.025	2006.78	0
136	2009	10	2	381.34	-0.00216	32	0.035	0.078	381.452	0.089	0.017	2009.76	0	2009.77	381.445	0.044	3	0.017	0.055
136	2009	10	5	381.3	-0.00329	42	0.035	0.151	381.486	0.091	0.025	2009.76	0
136	2009	10	15	381.26	-0.00273	34	0.035	0.104	381.398	0.089	0.02	2009.79	0
136	2012	11	30	381.31	-0.003	38	0.035	0.126	381.471	0.09	0.023	2012.92	0	2012.93	381.505	0.056	4	0.019	0.057
136	2012	12	4	381.31	-0.003	31	0.035	0.105	381.45	0.09	0.021	2012.93	0
136	2012	12	5	381.37	-0.0043	35	0.035	0.168	381.572	0.092	0.029	2012.93	0
136	2012	12	6	381.37	-0.0026	44	0.035	0.125	381.529	0.09	0.021	2012.93	0
136	2015	5	1	381.422	-0.0032	43	0.035	0.150	381.607	0.091	0.025	2015.34	0	2015.34	381.57	0.046	3	0.021	0.057
136	2015	5	4	381.385	-0.003	51	0.035	0.165	381.585	0.091	0.026	2015.34	0
136	2015	5	5	381.329	-0.0028	51	0.035	0.154	381.518	0.09	0.024	2015.35	0
139	1996	9	17	361.03	-0.0037	23	0.022	0.093	361.145	0.086	0.017	1996.71	0	1996.76	361.084	0.044	4	0.03	0.057
139	1996	9	17	360.94	-0.0045	25	0.022	0.122	361.084	0.087	0.021	1996.71	0
139	1996	9	18	360.85	-0.0078	23	0.022	0.195	361.067	0.09	0.031	1996.72	0
139	1996	11	21	360.9	-0.00666	16	0.022	0.120	361.042	0.088	0.024	1996.89	0
139	1998	8	10	360.89	-0.01044	13	0.022	0.157	361.069	0.09	0.033	1998.61	0	1998.81	361.113	0.051	3	0.04	0.066
139	1998	9	17	360.92	-0.00993	14	0.022	0.137	361.101	0.095	0.044	1998.71	0
139	1998	9	17	360.97	-0.01041	15	0.022	0.177	361.169	0.091	0.034	1998.71	0
139	1999	12	10	360.86	-0.00332	21	0.022	0.076	360.959	0.086	0.016	1999.94	0	2000	361.009	0.101	2	0.021	0.086
139	2000	2	16	360.92	-0.0038	27	0.028	0.110	361.058	0.086	0.019	2000.13	0
139	2001	5	21	360.96	-0.00234	27	0.028	0.068	361.056	0.085	0.014	2001.39	0	2001.39	361.027	0.047	3	0.021	0.055
139	2001	5	22	360.86	-0.00339	23	0.028	0.085	360.973	0.086	0.016	2001.39	0
139	2001	5	22	360.89	-0.00381	33	0.028	0.133	361.051	0.087	0.021	2001.39	0
139	2002	12	17	360.9	-0.0043	15	0.028	0.073	361.001	0.086	0.017	2002.96	0	2003.01	361.006	0.015	4	0.018	0.047
139	2002	12	17	360.88	-0.005	14	0.028	0.080	360.988	0.086	0.019	2002.96	0
139	2003	1	10	360.91	-0.0045	17	0.028	0.086	361.023	0.086	0.018	2003.03	0
139	2003	1	30	360.93	-0.0029	16	0.028	0.052	361.01	0.085	0.013	2003.08	0
139	2004	8	11	360.82	-0.0162	10	0.031	0.062	361.046	0.102	0.058	2004.61	0	2004.62	361.079	0.029	3	0.042	0.062
139	2004	8	12	360.92	-0.01	12	0.031	0.083	361.091	0.094	0.041	2004.62	0
139	2004	8	13	360.9	-0.006	26	0.031	0.168	361.099	0.088	0.026	2004.62	0
139	2006	10	20	360.94	-0.0057	18	0.031	0.114	361.085	0.087	0.022	2006.8	0	2007.54	361.07	0.05	3	0.018	0.055
139	2006	11	3	360.92	-0.0048	11	0.031	0.062	361.014	0.086	0.017	2006.84	0
139	2009	9	14	360.9	-0.0031	54	0.031	0.180	361.111	0.088	0.027	2009.71	0	2009.71	361.098	0.077	2	0.022	0.073
139	2009	9	15	360.89	-0.00321	47	0.031	0.164	361.085	0.088	0.026	2009.71	0
139	2012	11	15	360.9	-0.0033	39	0.031	0.142	361.073	0.088	0.025	2012.87	0	2012.9	361.083	0.049	4	0.02	0.053
139	2012	11	27	360.99	-0.0036	32	0.031	0.130	361.151	0.088	0.025	2012.91	0
139	2012	11	28	360.88	-0.0035	31	0.031	0.123	361.034	0.087	0.024	2012.91	0
139	2012	11	29	360.92	-0.0031	36	0.031	0.124	361.075	0.087	0.023	2012.91	0
139	2015	5	13	360.916	-0.0031	39	0.031	0.133	361.08	0.087	0.023	2015.37	0	2015.38	361.052	0.028	3	0.02	0.05
139	2015	5	14	360.837	-0.0027	54	0.031	0.157	361.025	0.088	0.024	2015.37	0
139	2015	5	27	360.872	-0.0031	44	0.031	0.149	361.052	0.088	0.025	2015.41	0
146	1996	9	19	389.53	-0.0053	21	0.026	0.122	389.678	0.091	0.022	1996.72	0	1997.05	389.61	0.062	3	0.025	0.064
146	1996	11	13	389.43	-0.0066	13	0.026	0.099	389.555	0.091	0.023	1996.87	0
146	1997	1	5	389.48	-0.0051	16	0.026	0.092	389.598	0.09	0.02	1997.01	0
146	1998	8	24	389.27	-0.00739	20						1998.65	1	1998.86	389.899	0.084	1	0.042	0.105
146	1998	9	23	389.7	-0.0108	14	0.026	0.122	389.899	0.1	0.047	1998.73	0
146	2000	1	11	389.52	-0.00362	16	0.032	0.065	389.617	0.09	0.015	2000.03	0	2000.06	389.635	0.115	5	0.014	0.071
146	2000	1	12	389.4	-0.00154	19	0.032	0.032	389.464	0.089	0.01	2000.03	0
146	2000	1	12	389.53	-0.00291	19	0.032	0.061	389.623	0.089	0.014	2000.03	0
146	2000	2	9	389.59	-0.00333	21	0.032	0.077	389.699	0.09	0.016	2000.11	0
146	2000	2	9	389.69	-0.00214	22	0.032	0.051	389.773	0.089	0.012	2000.11	0
146	2001	5	31	389.59	-0.00375	18	0.032	0.075	389.697	0.09	0.016	2001.42	0	2001.43	389.711	0.012	4	0.02	0.051
146	2001	6	1	389.57	-0.00394	25	0.032	0.106	389.708	0.09	0.019	2001.42	0
146	2001	6	4	389.59	-0.00314	27	0.032	0.091	389.713	0.09	0.017	2001.43	0
146	2001	6	4	389.61	-0.00259	30	0.032	0.083	389.725	0.09	0.015	2001.43	0
146	2002	12	19	389.59	-0.0089	11	0.032	0.116	389.738	0.093	0.028	2002.97	0	2003.09	389.698	0.059	5	0.026	0.059
146	2002	12	20	389.56	-0.01	12	0.032	0.140	389.732	0.094	0.031	2002.97	0
146	2002	12	20	389.59	-0.0086	12	0.032	0.120	389.742	0.092	0.028	2002.97	0
146	2003	4	4	389.49	-0.0048	16	0.032	0.086	389.608	0.09	0.019	2003.26	0
146	2003	4	5	389.59	-0.002	21	0.032	0.046	389.668	0.089	0.011	2003.26	0
146	2004	10	18	389.6	-0.00736	21	0.036	0.169	389.806	0.093	0.029	2004.63	0	2004.63	389.788	0.042	2	0.033	0.064
146	2004	10	18	389.62	-0.00705	14	0.036	0.113	389.769	0.092	0.024	2004.63	0
146	2004	10	19	389.64	-0.00673	14	0.036	0.108	389.784	0.091	0.023	2004.64	0
146	2006	11	10	389.64	-0.0055	14	0.036	0.088	389.764	0.091	0.02	2006.86	0	2006.86	389.765	0.053	2	0.014	0.061
146	2006	11	13	389.66	-0.0041	15	0.036	0.070	389.766	0.09	0.017	2006.87	0
146	2009	8	19	389.54	-0.0024	39	0.036	0.103	389.679	0.09	0.019	2009.64	0	2009.64	389.703	0.075	2	0.017	0.072
146	2009	8	21	389.56	-0.00275	44	0.036	0.132	389.728	0.091	0.022	2009.64	0
146	2012	8	2	389.72	-0.003	51	0.036	0.165	389.921	0.092	0.026	2012.59	0
146	2012	8	9	389.67	-0.0036	47	0.036	0.184	389.89	0.093	0.029	2012.61	0	2013.24	389.81	0.108	5	0.021	0.07
146	2012	8	16	389.74	-0.0035	47	0.036	0.179	389.955	0.093	0.028	2012.63	0
146	2012	8	20	389.6	-0.003	47	0.036	0.153	389.789	0.092	0.025	2012.64	0
146	2013	2	11	389.61	-0.0035	30	0.036	0.119	389.765	0.091	0.024	2013.11	0
146	2013	2	12	389.66	-0.0036	30	0.036	0.122	389.819	0.092	0.024	2013.12	0
146	2015	4	22	389.458	-0.0033	41	0.036	0.149	389.643	0.092	0.025	2015.31	0	2015.31	389.712	0.064	3	0.021	0.063
146	2015	4	23	389.578	-0.0033	43	0.036	0.155	389.769	0.092	0.026	2015.31	0
146	2015	4	24	389.534	-0.0033	43	0.036	0.155	389.725	0.092	0.026	2015.32	0
17440	2004	11	7	479.5	-0.0088	13	0.054	0.132	479.686	0.105	0.029	2004.85	0	2004.86	479.658	0.03	3	0.036	0.07
17440	2004	11	9	479.42	-0.0085	16	0.054	0.153	479.627	0.105	0.029	2004.86	0
17440	2004	11	10	479.44	-0.0093	16	0.054	0.167	479.662	0.106	0.032	2004.86	0
17440	2007	1	22	479.61	-0.0041	15	0.054	0.070	479.734	0.102	0.017	2007.06	0	2007.06	479.708	0.061	2	0.013	0.073
17440	2007	1	23	479.56	-0.0043	14	0.054	0.069	479.683	0.102	0.017	2007.06	0
17440	2009	11	9	479.61	-0.00377	34	0.054	0.143	479.808	0.104	0.026	2009.86	0	2009.86	479.739	0.061	3	0.02	0.07
17440	2009	11	10	479.51	-0.0032	36	0.054	0.128	479.692	0.104	0.023	2009.86	0
17440	2009	11	12	479.53	-0.0034	35	0.054	0.133	479.717	0.104	0.024	2009.87	0
17440	2013	1	22	479.51	-0.0047	28	0.054	0.150	479.715	0.105	0.03	2013.06	0	2013.06	479.716	0.037	3	0.023	0.065
17440	2013	1	23	479.56	-0.0042	29	0.054	0.139	479.753	0.105	0.027	2013.06	0
17440	2013	1	24	479.48	-0.0037	35	0.054	0.144	479.679	0.104	0.026	2013.07	0
17440	2015	4	8	479.461	-0.004	44	0.054	0.192	479.707	0.106	0.03	2015.27	0	2015.28	479.761	0.054	4	0.026	0.068
17440	2015	4	9	479.499	-0.0042	38	0.054	0.176	479.73	0.105	0.03	2015.27	0
17440	2015	4	14	479.613	-0.0042	34	0.054	0.160	479.827	0.105	0.029	2015.29	0
17440	2015	4	15	479.52	-0.0042	45	0.054	0.206	479.78	0.106	0.032	2015.29	0
71578	2012	2	2	549.417	-0.00364	32	0.071	0.131	549.619	0.114	0.025	2012.09	0	2012.28	549.612	0.066	4	0.025	0.077
71578	2012	2	6	549.473	-0.00409	34	0.071	0.155	549.699	0.115	0.028	2012.1	0
71578	2012	2	7	549.37	-0.00388	34	0.071	0.147	549.588	0.114	0.027	2012.1	0
71578	2012	6	22	549.21	-0.00451	54	0.071	0.262	549.543	0.117	0.037	2012.48	0
71578	2013	2	19	549.36	-0.00475	29	0.071	0.157	549.588	0.115	0.03	2013.14	0	2013.24	549.621	0.069	2	0.027	0.086
71578	2013	5	1	549.39	-0.00472	37	0.071	0.194	549.654	0.116	0.032	2013.34	0
71578	2016	4	6	549.21	-0.00498	41	0.071	0.224	549.505	0.117	0.035	2016.27	0	2016.27	549.442	0.047	4	0.032	0.076
71578	2016	4	7	549.11	-0.00498	42	0.071	0.229	549.41	0.117	0.036	2016.27	0
71578	2016	4	11	549.06	-0.00455	56	0.071	0.273	549.404	0.117	0.038	2016.28	0
71578	2016	4	12	549.15	-0.0048	44	0.071	0.230	549.451	0.117	0.035	2016.28	0
71578	2016	12	13						549.659	0.138	0.021	2016.95	0	2016.99	549.62	0.028	5	0.03	0.075
71578	2016	12	15						549.628	0.138	0.021	2016.96	0
71578	2016	12	16						549.605	0.138	0.021	2016.96	0
71878	2016	1	13						549.585	0.138	0.021	2017.04	0
71578	2016	1	19						549.623	0.138	0.021	2017.05	0
8231	2014	5	9	588.675	-0.00476	29	0.081	0.157	588.913	0.121	0.03	2014.36	0	2014.72	588.923	0.015	3	0.029	0.077
8231	2014	11	19	588.645	-0.00593	28	0.081	0.190	588.916	0.122	0.036	2014.89	0
8231	2014	11	24	588.687	-0.00595	25	0.081	0.173	588.941	0.122	0.035	2014.9	0
8231	2014	11	25	588.48	-0.00621	26	0.081	0.186	588.747	0.122	0.037	2014.9	0
8231	2015	3	17	588.45	-0.0053	45	0.081	0.260	588.791	0.123	0.039	2015.21	0	2015.23	588.866	0.072	3	0.034	0.088
8231	2015	3	18	588.54	-0.0055	42	0.081	0.253	588.874	0.123	0.039	2015.22	0
8231	2015	4	2	588.61	-0.0054	41	0.081	0.243	588.934	0.123	0.038	2015.26	0
8231	2017	1	20						588.932	0.147	0.029	2017.05	0	2017.08	588.959	0.091	5	0.04	0.09
8231	2017	1	24						589.025	0.147	0.029	2017.07	0
8231	2017	1	30									2017.08	1
8231	2017	1	31						588.814	0.147	0.029	2017.09	0
8231	2017	2	2						589.037	0.147	0.029	2017.09	0
	2017	2	3						588.985	0.147	0.029	2017.09	0
8231	2015	1	14	720	-0.0077	30	0.121	0.262	720.383	0.143	0.046	2015.04	0	2015.42	720.359	0.079	6	0.042	0.101
11054	2015	1	16	719.933	-0.0078	30	0.121	0.265	720.319	0.143	0.047	2015.04	0
11054	2015	1	20	719.851	-0.0085	28	0.121	0.272	720.244	0.144	0.049	2015.05	0
11054	2015	1	21	719.935	-0.0083	30	0.121	0.282	720.338	0.144	0.049	2015.06	0
11054	2016	2	26	720	-0.00716	34	0.121	0.272	720.393	0.143	0.045	2016.15	0	2016.16	720.375	0.113	3	0.04	0.115
11054	2016	2	29	720.08	-0.0069	36	0.121	0.276	720.477	0.143	0.045	2016.16	0
11054	2016	3	2	719.87	-0.0071	33	0.121	0.263	720.254	0.143	0.044	2016.17	0
11054	2017	2	6						720.087	0.153	0.048	2017.1	0	2017.12	720.189	0.138	4	0.04	0.107
11054	2017	2	7						720.07	0.153	0.047	2017.1	0
11054	2017	2	12									2017.12	1
11054	2017	2	15						720.235	0.176	0.035	2017.12	0
11054	2017	2	16						720.364	0.177	0.035	2017.13	0
11054	2017	2	23									2017.15	1
71605	2016	2	11	791.17	-0.0077	34	0.146	0.293	791.609	0.153	0.048	2016.11	0	2016.13	791.415	0.137	4	0.042	0.124
71605	2016	2	16	790.99	-0.0075	33	0.146	0.278	791.414	0.153	0.047	2016.13	0
71605	2016	2	17	790.89	-0.0076	34	0.146	0.289	791.325	0.153	0.048	2016.13	0
71605	2016	2	22	790.89	-0.00725	34	0.146	0.276	791.312	0.153	0.046	2016.14	0
71605	2017	2	27						791.778	0.193	0.039	2017.16	0	2017.17	791.618	0.157	6	0.04	0.121
71605	2017	2	28						791.585	0.193	0.039	2017.16	0
71605	2017	3	1						791.334	0.193	0.039	2017.17	0
71605	2017	3	2						791.709	0.193	0.039	2017.17	0
71605	2017	3	3						791.595	0.193	0.039	2017.17	0
71605	2017	3	6						791.705	0.193	0.039	2017.18	0
71605	2020	1	10						791.577	0.196	0.039	2020.03	0	2020.04	791.598	0.095	3	0.039	0.116
71605	2020	1	17						791.701	0.196	0.039	2020.05	0
71605	2020	1	20						791.515	0.2	0.04	2020.06	0
10726	2016	1	11	594.89	-0.006	30	0.083	0.204	595.177	0.123	0.037	2016.03	0	2016.04	595.15	0.092	5	0.031	0.088
10726	2016	1	12	594.8	-0.0056	30	0.083	0.190	595.073	0.123	0.035	2016.03	0
10726	2016	1	19	594.93	-0.0056	31	0.083	0.196	595.209	0.123	0.035	2016.05	0
10726	2016	1	20	594.76	-0.0057	30	0.083	0.194	595.037	0.123	0.035	2016.05	0
10726	2016	1	22	594.95	-0.0055	36	0.083	0.220	595.253	0.123	0.037	2016.06	0
